# Supplementary material for: Diol glycidyl ether-bridged cyclens: preparation and their applications in gene delivery
Source: Royal Society of Chemistry journal article supplement (doi:10.1039/c0ob00879f), 2011-01-01
Supplement: c0ob00879f.pdf [file c0ob00879f.pdf]

# Supplementary Information

## Diol Glycidyl Ether-Bridged Cyclens: Preparation and Their Applications in Gene Delivery

*Wen-Jing Yi<sup>1</sup>, Zhi-Hua Feng<sup>1</sup>, Qin-Fang Zhang, Ji Zhang<sup>\*</sup>, Ling-Dong Li, Wen Zhu<sup>\*</sup>, and*

*Xiao-Qi Yu<sup>\*</sup>*

*Key Laboratory of Green Chemistry and Technology (Ministry of Education), College of Chemistry, and State Key Laboratory of Biotherapy, West China Hospital, Sichuan University, Chengdu 610064, People's Republic of China.*

<sup>1</sup> These authors contributed equally to this work.

|                                              |     |
|----------------------------------------------|-----|
| Characterization of compound <b>2d</b> ..... | S1  |
| Characterization of compound <b>2e</b> ..... | S3  |
| Characterization of polymers <b>5</b> .....  | S5  |
| GPC sheets.....                              | S10 |

# IR spectrum of 2d

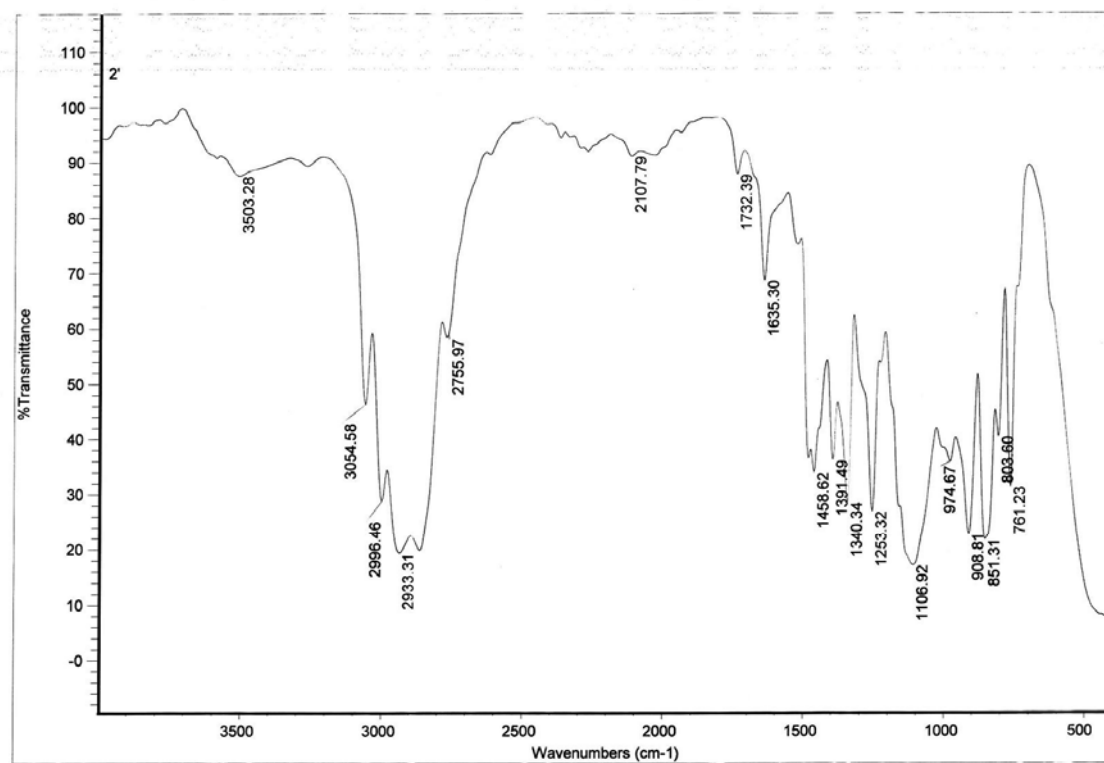

# <sup>1</sup>H NMR spectrum of 2d

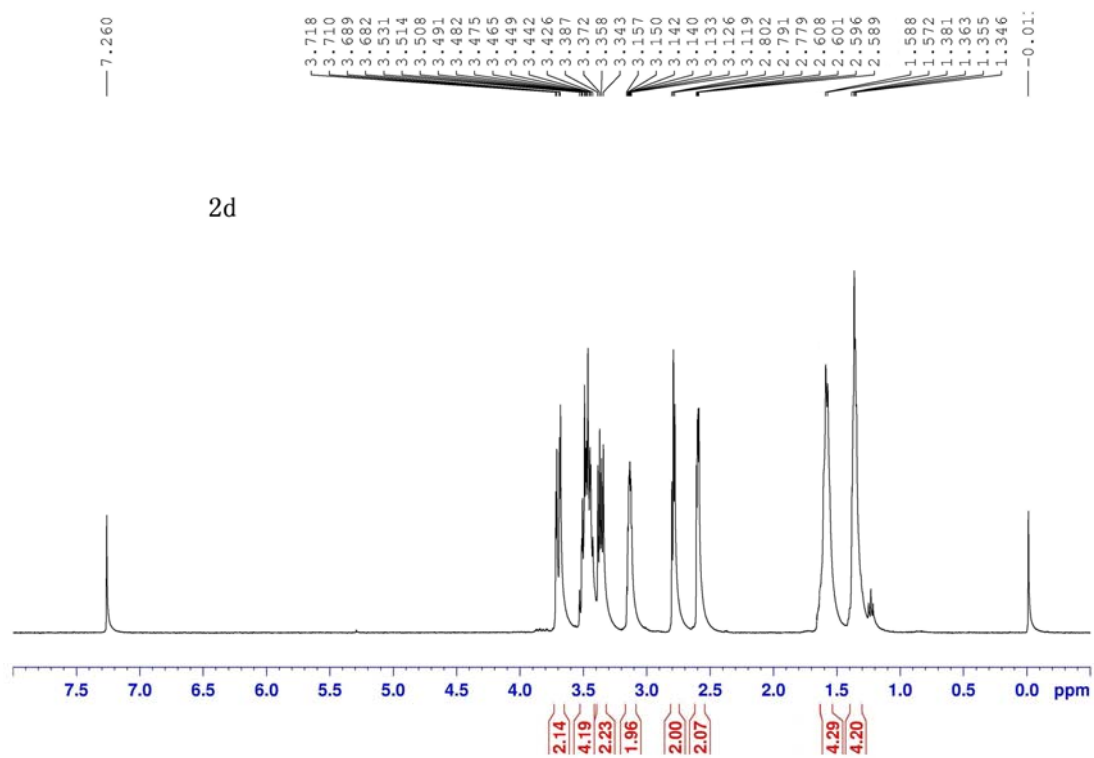

$^{13}\text{C}$  NMR spectrum of **2d**

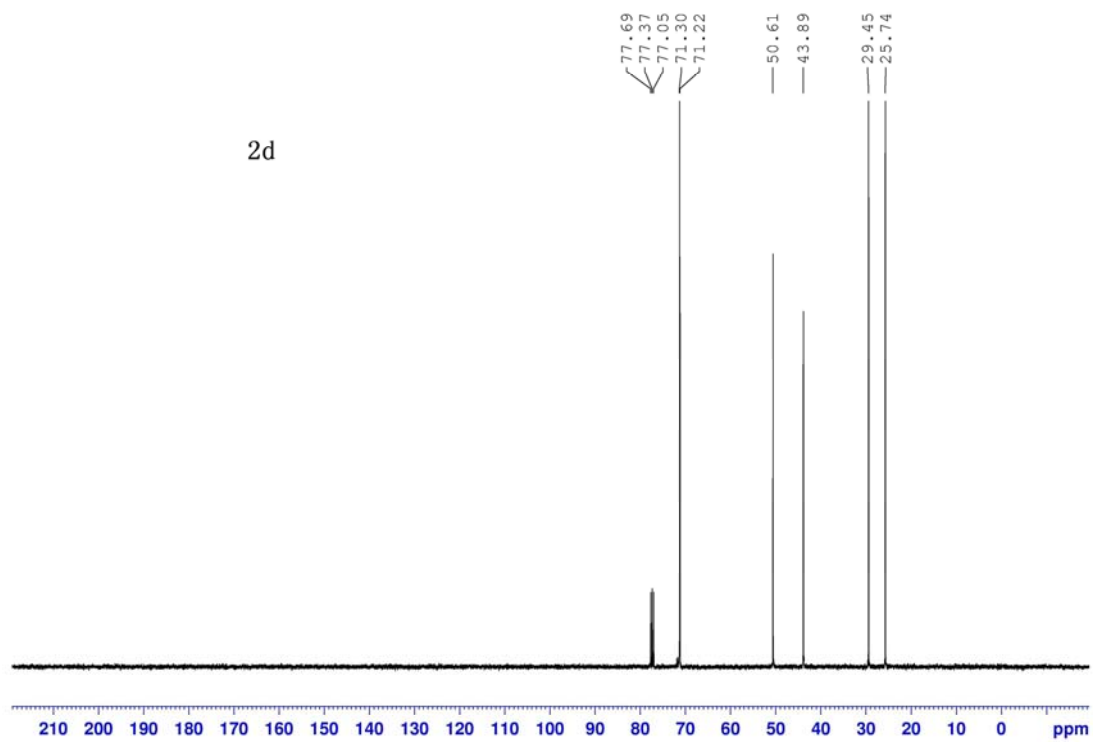

# IR spectrum of 2e

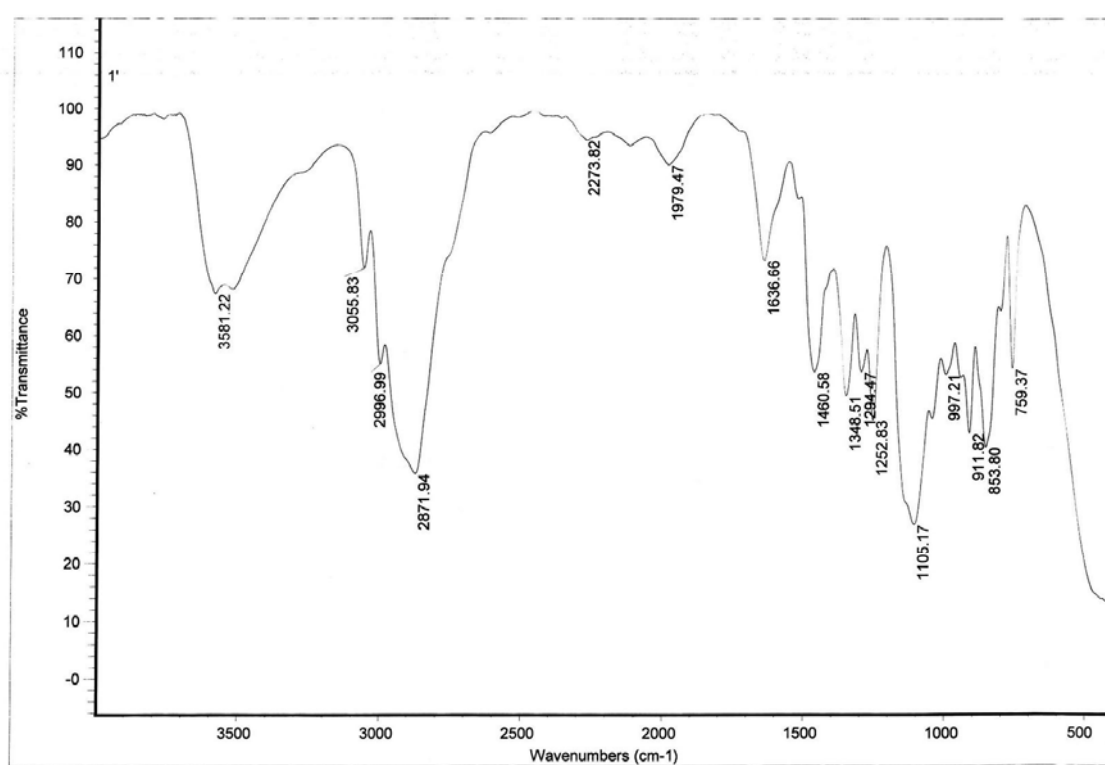

# <sup>1</sup>H NMR spectrum of 2e

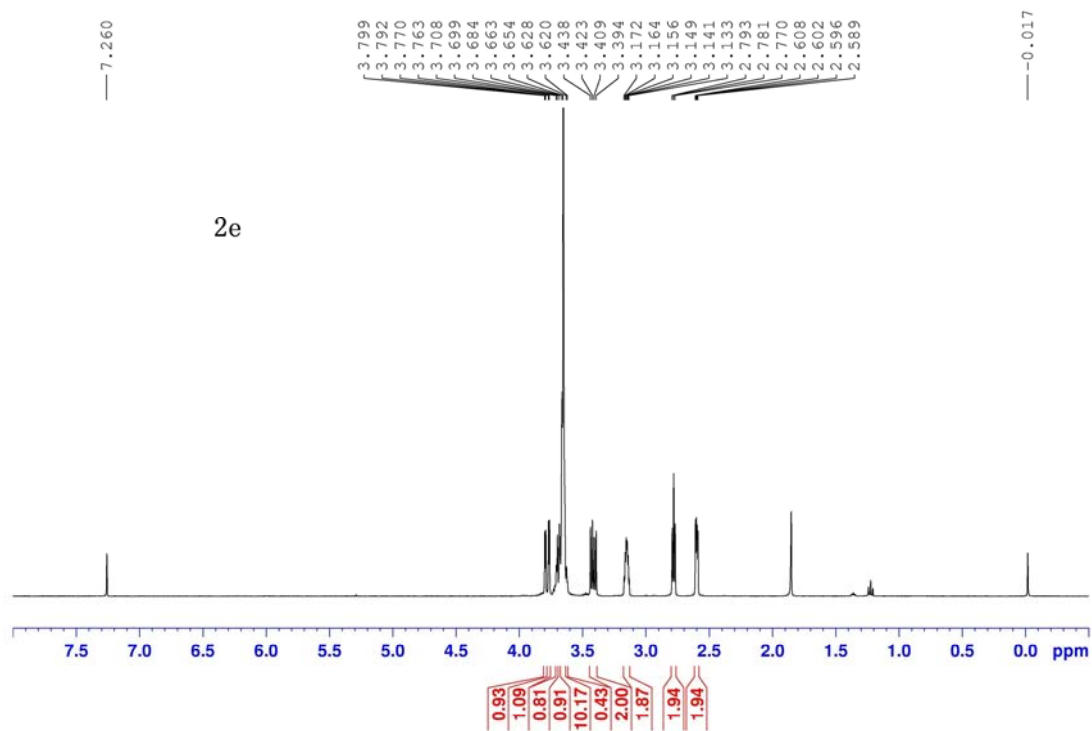

$^{13}\text{C}$  NMR spectrum of **2e**

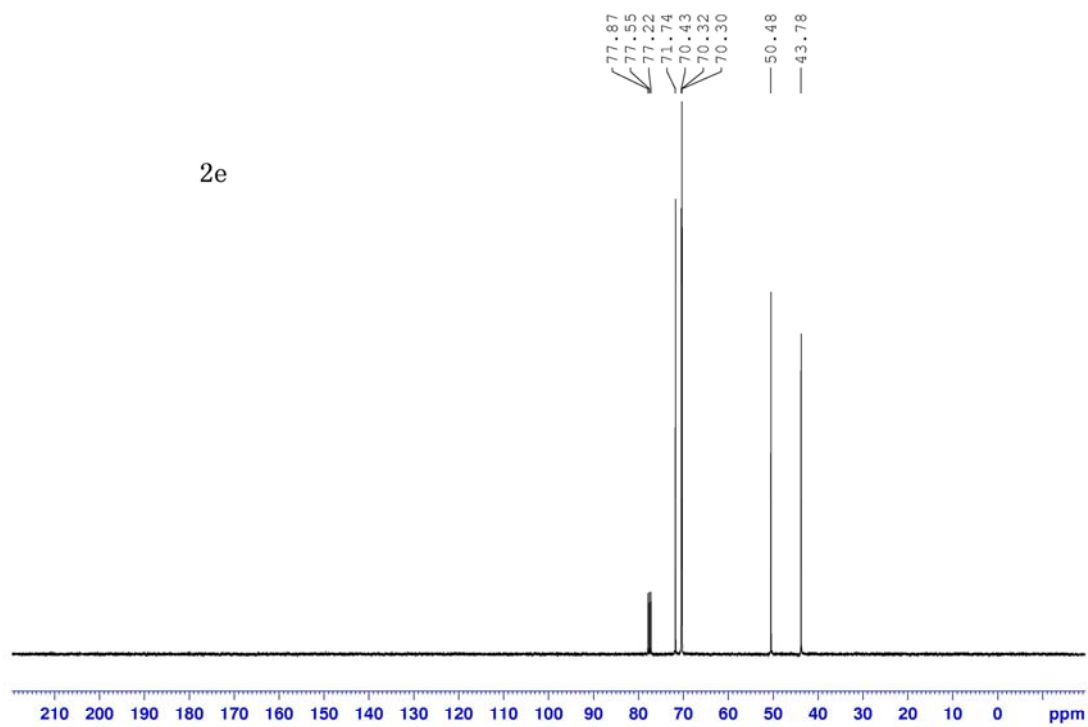

### IR spectrum of **5a**

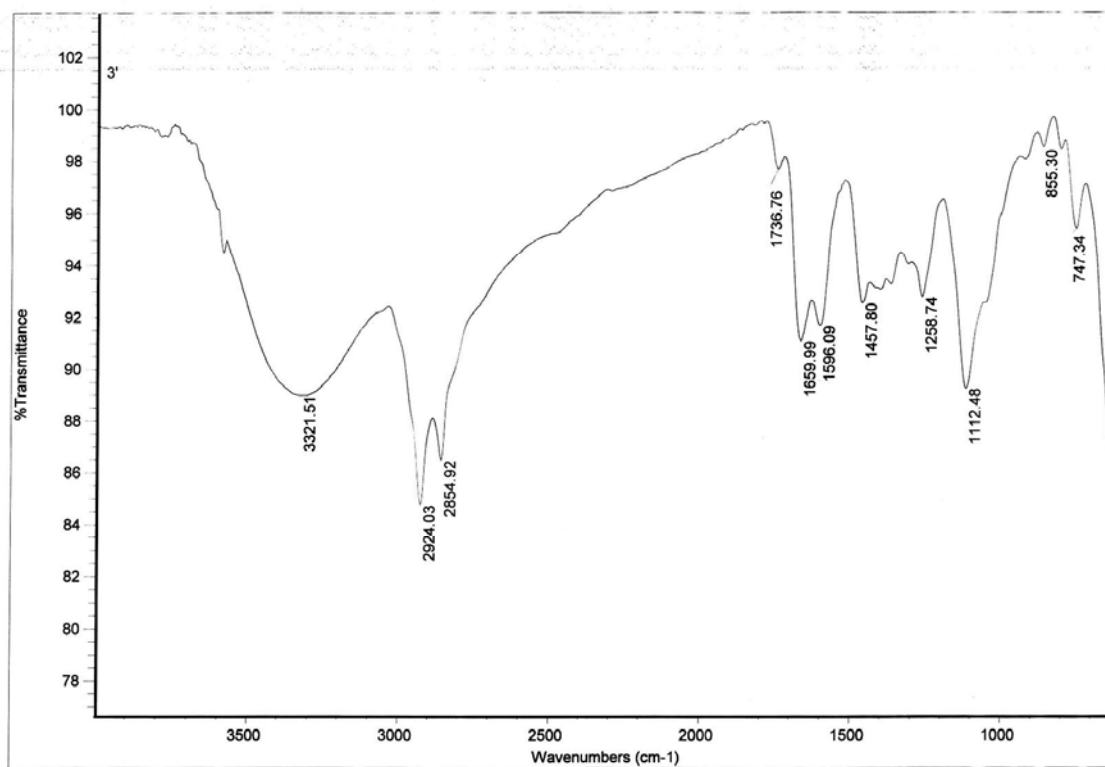

### <sup>1</sup>H NMR spectrum of **5a**

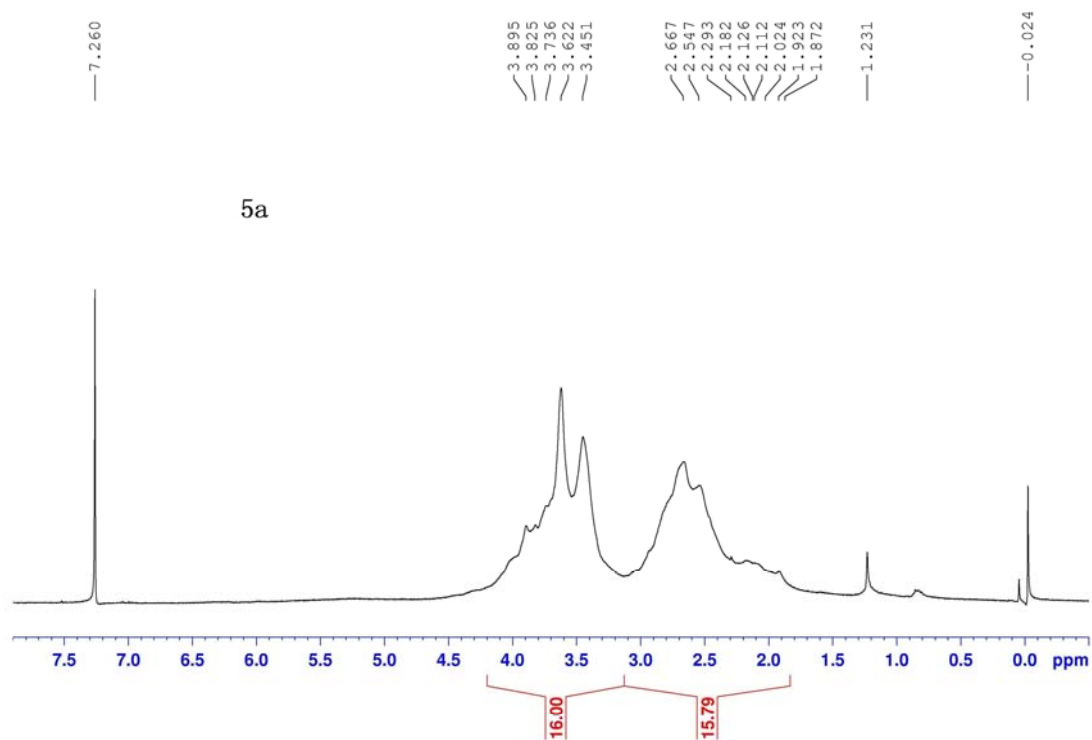

### IR spectrum of **5b**

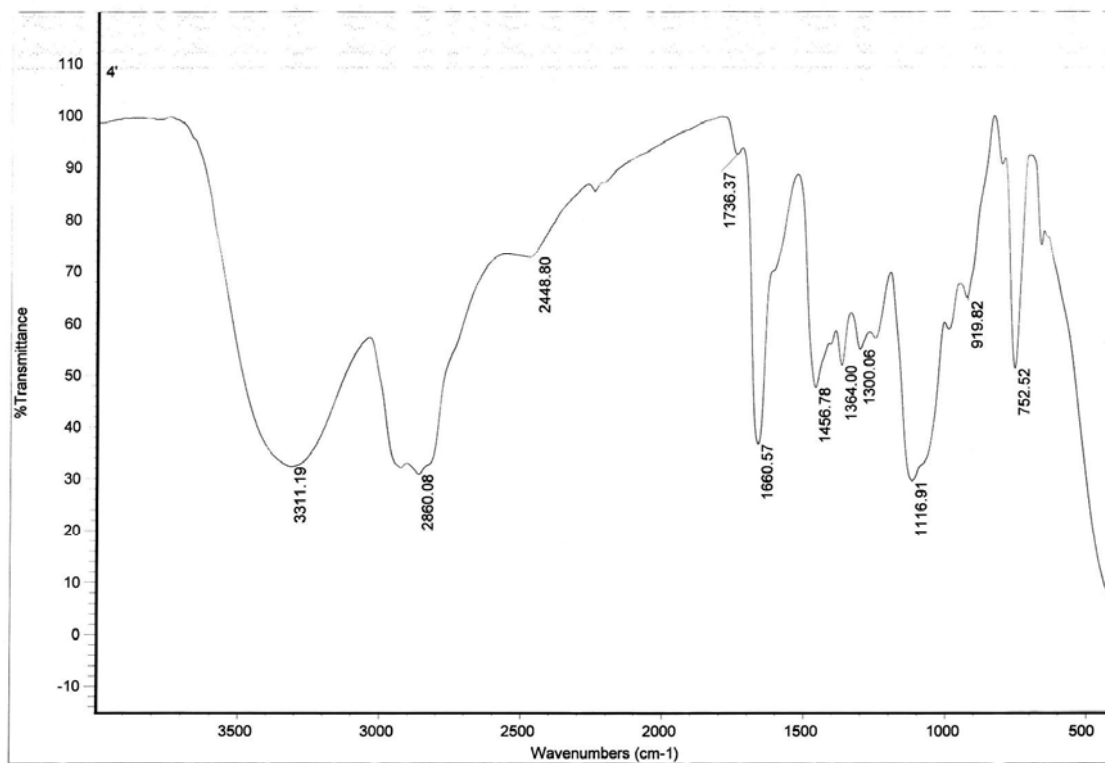

### <sup>1</sup>H NMR spectrum of **5b**

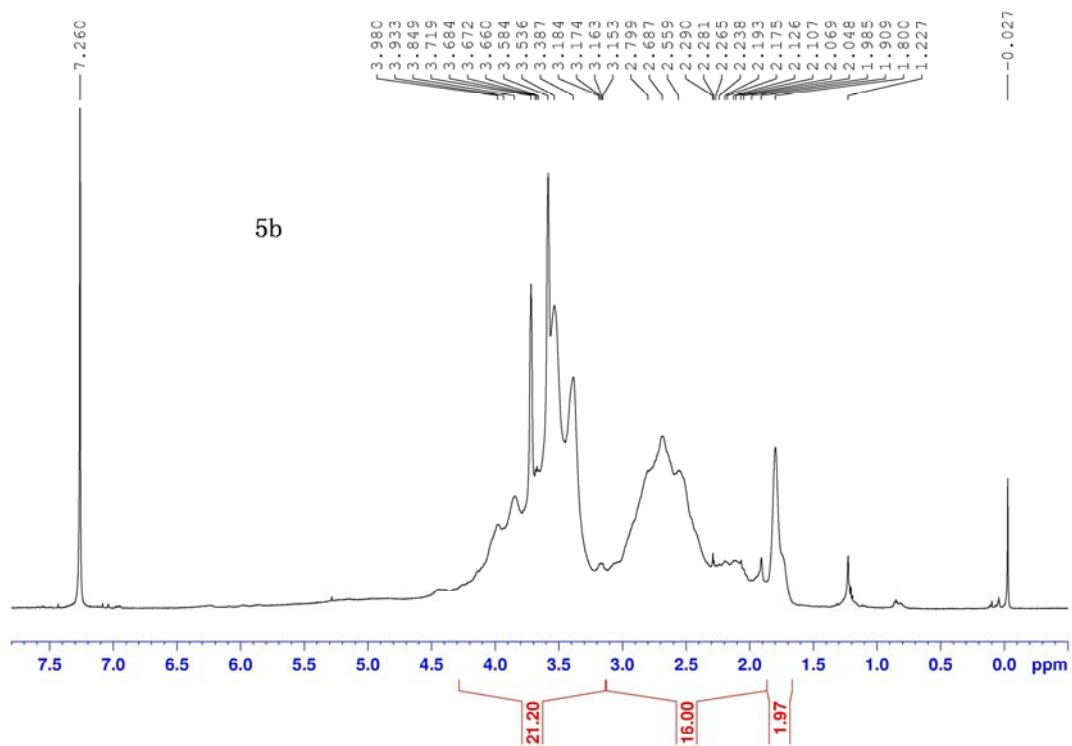

### IR spectrum of **5c**

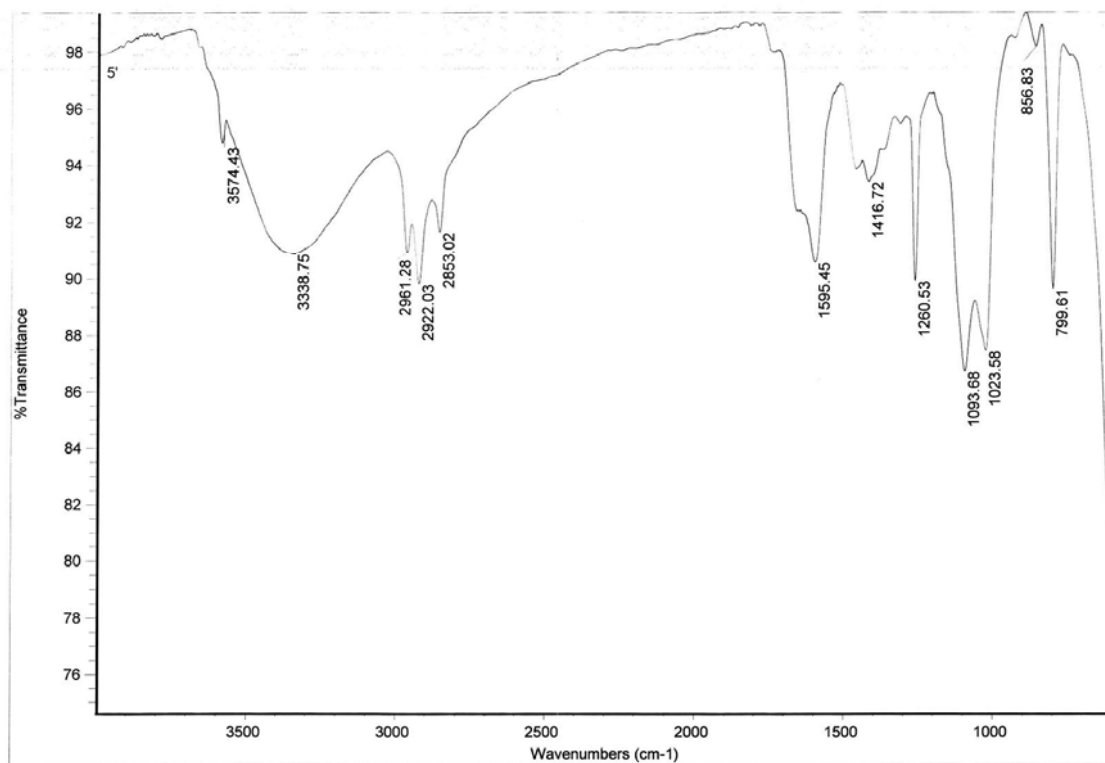

### <sup>1</sup>H NMR spectrum of **5c**

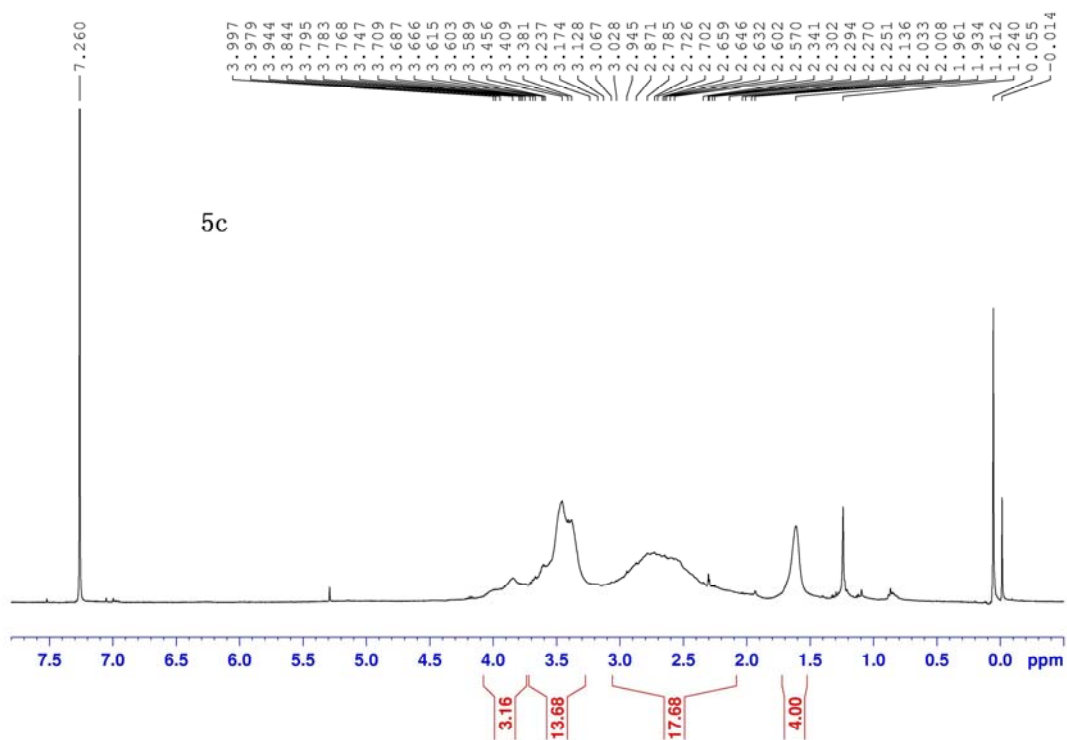



### IR spectrum of **5d**

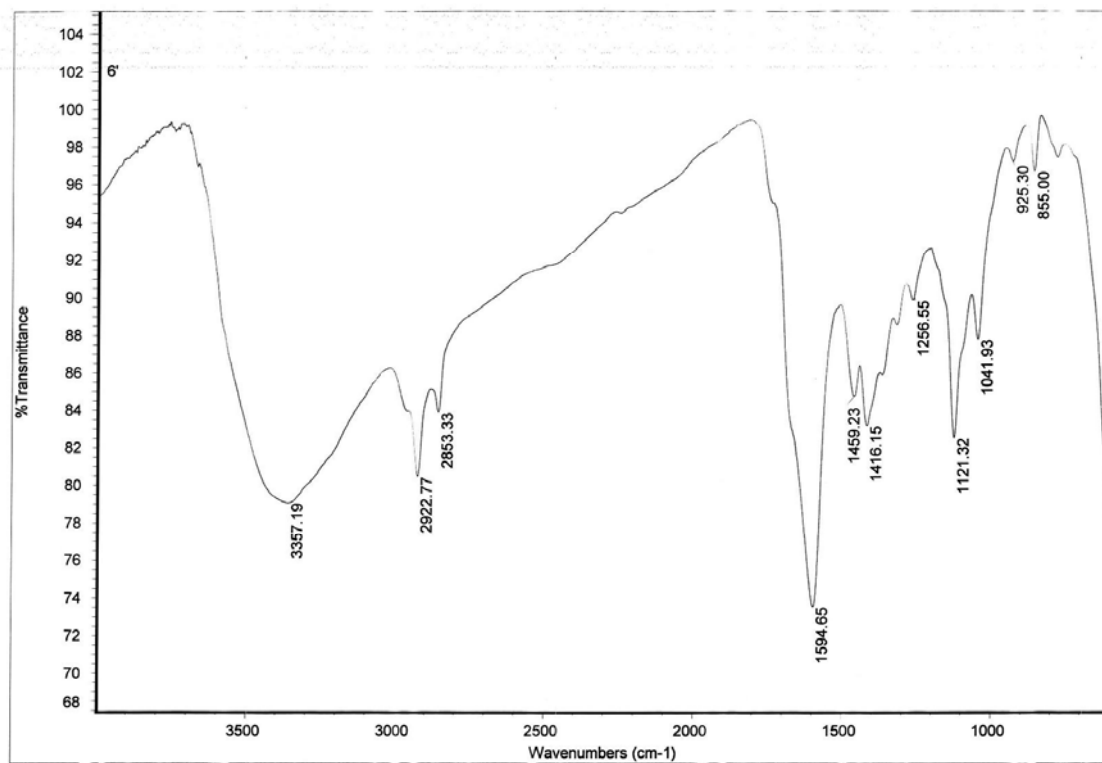

### <sup>1</sup>H NMR spectrum of **5d**

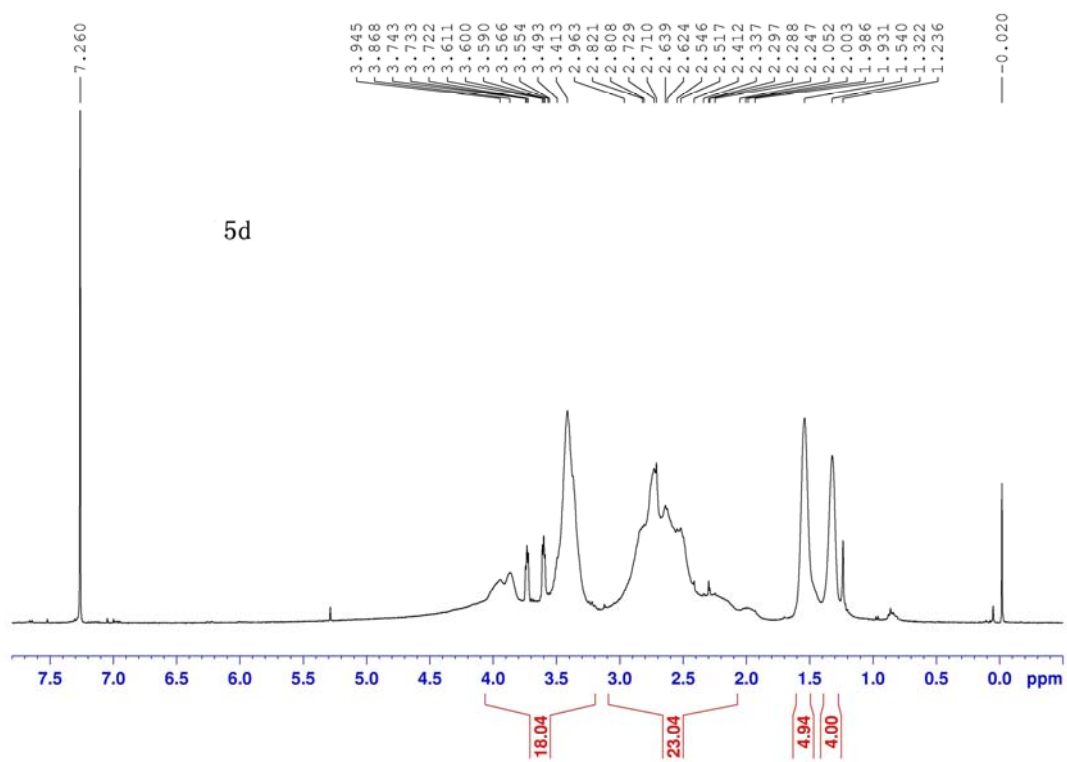

### IR spectrum of **5e**

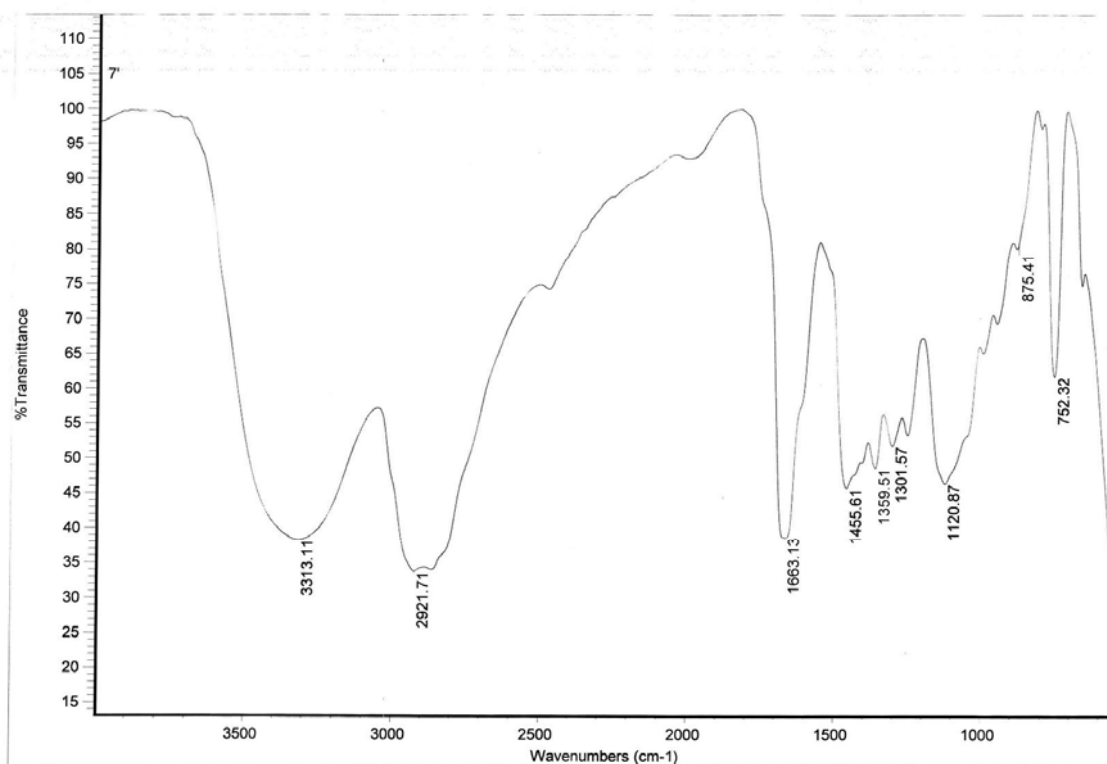

### <sup>1</sup>H NMR spectrum of **5e**

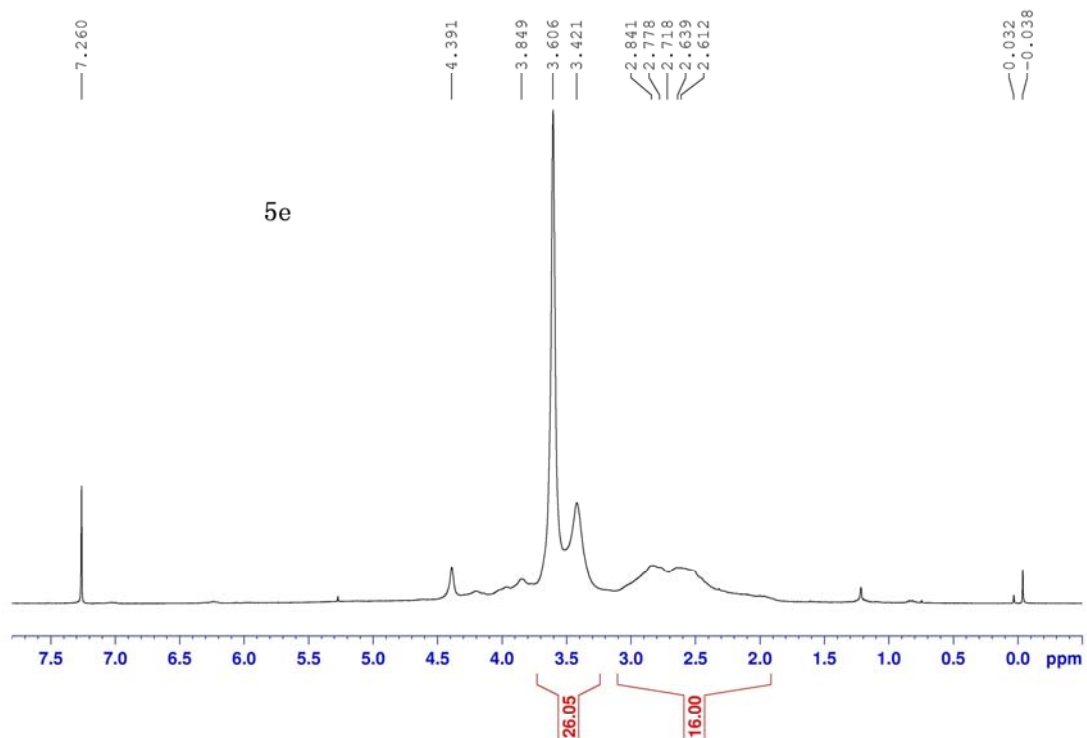

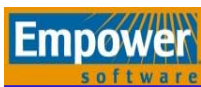

Reported by User: System

Project Name: GPC

送样单位:

检测单位: 中国科学院成都分院分析测试中心 检测人员: 龙远德 028-85223712

| SAMPLE INFORMATION |               |                     |                   |
|--------------------|---------------|---------------------|-------------------|
| Sample Name:       | Y-5-a         | Acquired By:        | System            |
| Sample Type:       | Broad Unknown | Date Acquired:      | 2010-7-6 12:38:05 |
| Vial:              | 1             | Acq. Method Set:    | GPC               |
| Injection #:       | 2             | Date Processed:     | 2010-7-6 17:58:10 |
| Injection Volume:  | 20.00 ul      | Processing Method:  | PEG               |
| Run Time:          | 10.0 Minutes  | Channel Name:       | Satin Ch 1        |
| Sample Set Name:   |               | Proc. Chnl. Descr.: | GPC               |

Auto-Scaled Chromatogram

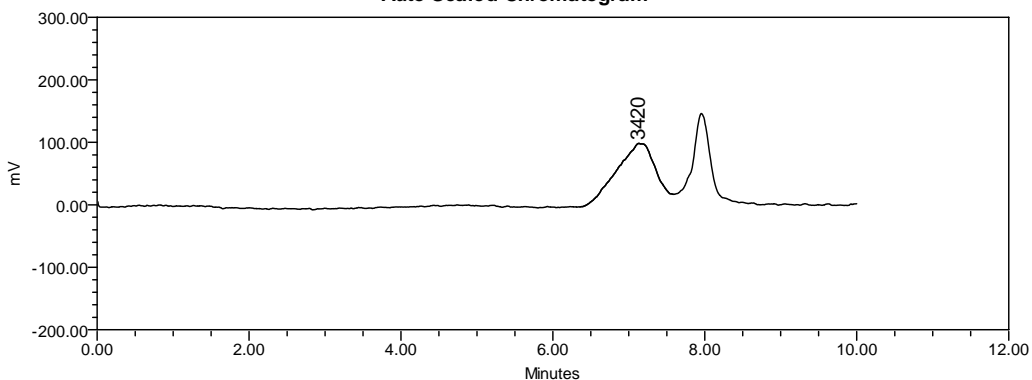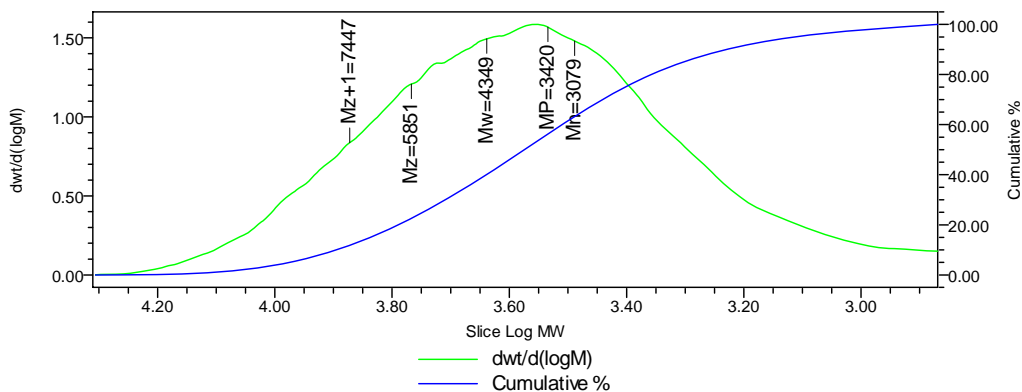

GPC Results

|   | MP (Daltons) | Mw   | Mn   | Polydispersity |
|---|--------------|------|------|----------------|
| 1 | 3420         | 4349 | 3079 | 1.41           |



Reported by User: System

Project Name: GPC

送样单位:

检测单位: 中国科学院成都分院分析测试中心 检测人员: 龙远德 028-85223712

| SAMPLE INFORMATION |               |                     |                   |
|--------------------|---------------|---------------------|-------------------|
| Sample Name:       | Y-5-b         | Acquired By:        | System            |
| Sample Type:       | Broad Unknown | Date Acquired:      | 2010-7-6 13:07:32 |
| Vial:              | 1             | Acq. Method Set:    | GPC               |
| Injection #:       | 3             | Date Processed:     | 2010-7-6 17:58:34 |
| Injection Volume:  | 10.00 ul      | Processing Method:  | PEG               |
| Run Time:          | 10.0 Minutes  | Channel Name:       | Satin Ch 1        |
| Sample Set Name:   |               | Proc. Chnl. Descr.: | GPC               |

Auto-Scaled Chromatogram

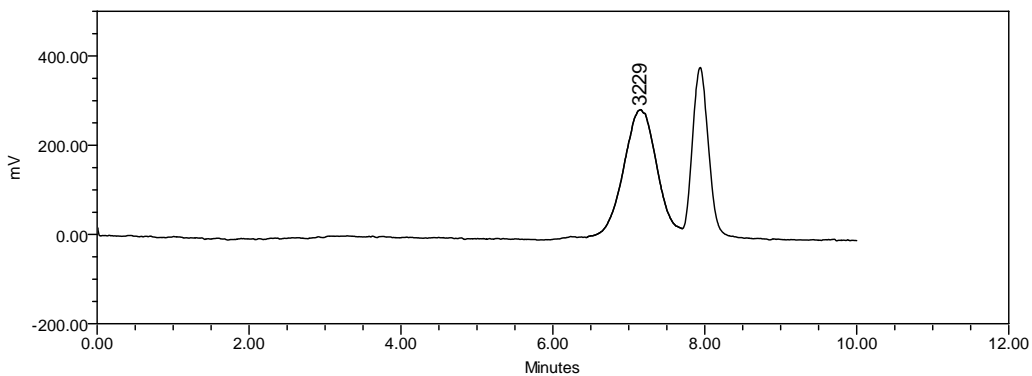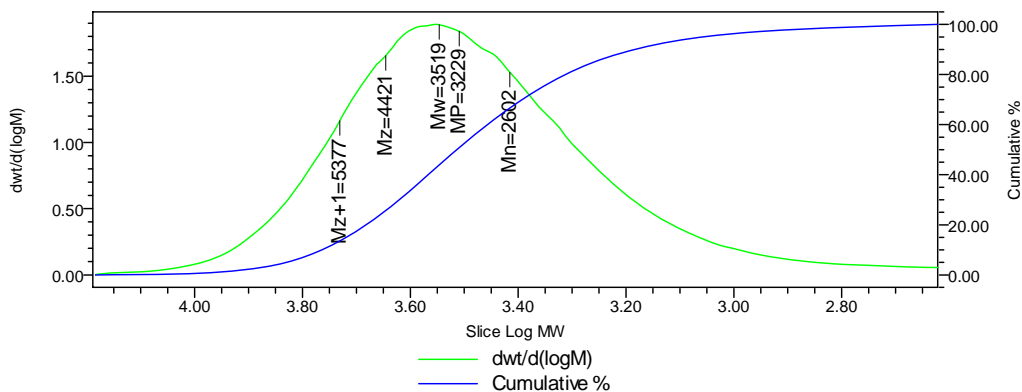

GPC Results

|   | MP (Daltons) | Mw   | Mn   | Polydispersity |
|---|--------------|------|------|----------------|
| 1 | 3229         | 3519 | 2602 | 1.35           |

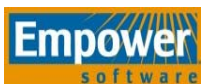

Reported by User: System

Project Name: GPC

送样单位:

检测单位: 中国科学院成都分院分析测试中心 检测人员: 龙远德 028-85223712

| SAMPLE INFORMATION |               |                     |                   |
|--------------------|---------------|---------------------|-------------------|
| Sample Name:       | Y-5-c         | Acquired By:        | System            |
| Sample Type:       | Broad Unknown | Date Acquired:      | 2010-7-6 13:19:16 |
| Vial:              | 1             | Acq. Method Set:    | GPC               |
| Injection #:       | 4             | Date Processed:     | 2010-7-6 17:58:55 |
| Injection Volume:  | 10.00 ul      | Processing Method:  | PEG               |
| Run Time:          | 10.0 Minutes  | Channel Name:       | Satin Ch 1        |
| Sample Set Name:   |               | Proc. Chnl. Descr.: | GPC               |

Auto-Scaled Chromatogram

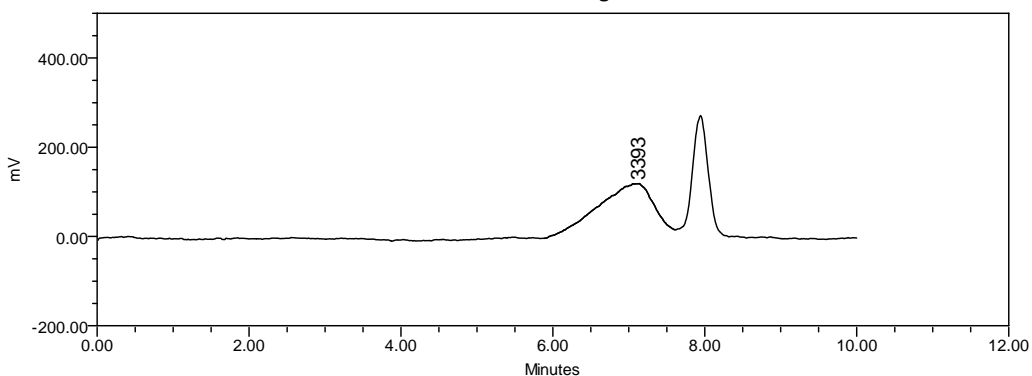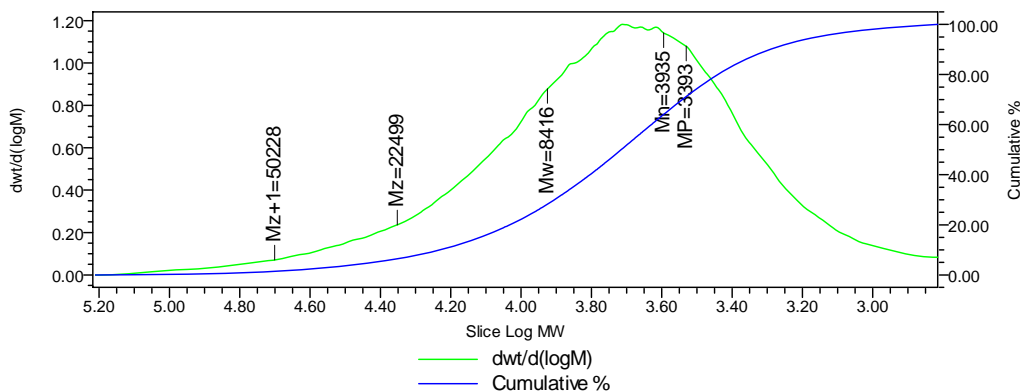

GPC Results

|   | MP (Daltons) | Mw   | Mn   | Polydispersity |
|---|--------------|------|------|----------------|
| 1 | 3393         | 8416 | 3935 | 2.14           |



Reported by User: System

Project Name: GPC

送样单位:

检测单位: 中国科学院成都分院分析测试中心 检测人员: 龙远德 028-85223712

| SAMPLE INFORMATION |               |                     |                   |
|--------------------|---------------|---------------------|-------------------|
| Sample Name:       | Y-5-d         | Acquired By:        | System            |
| Sample Type:       | Broad Unknown | Date Acquired:      | 2010-7-6 13:32:43 |
| Vial:              | 1             | Acq. Method Set:    | GPC               |
| Injection #:       | 5             | Date Processed:     | 2010-7-6 18:01:03 |
| Injection Volume:  | 10.00 ul      | Processing Method:  | PEG               |
| Run Time:          | 10.0 Minutes  | Channel Name:       | Satin Ch 1        |
| Sample Set Name:   |               | Proc. Chnl. Descr.: | GPC               |

Auto-Scaled Chromatogram

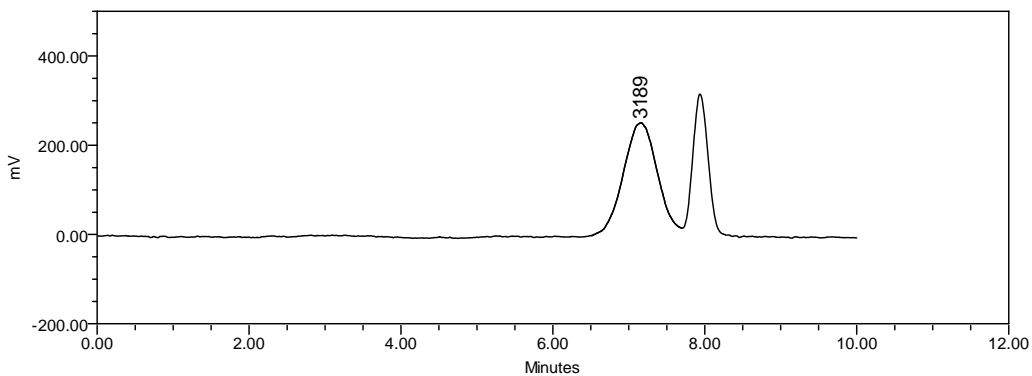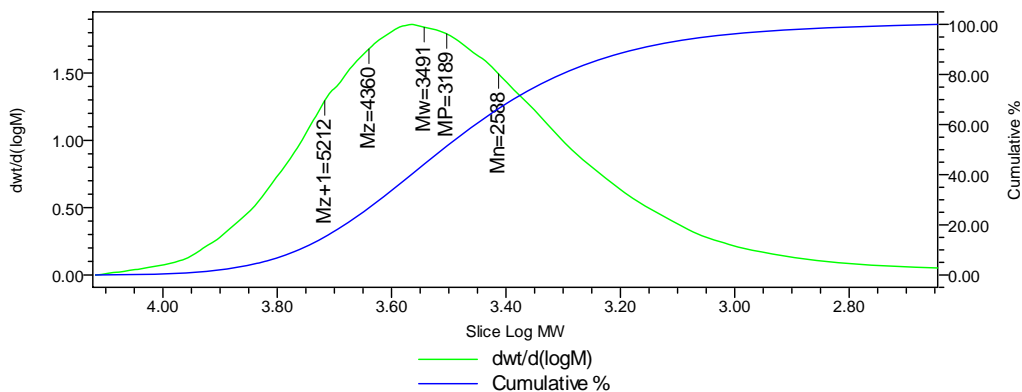

GPC Results

|   | MP (Daltons) | Mw   | Mn   | Polydispersity |
|---|--------------|------|------|----------------|
| 1 | 3189         | 3491 | 2588 | 1.35           |



Reported by User: System

Project Name: GPC

送样单位:

检测单位: 中国科学院成都分院分析测试中心 检测人员: 龙远德 028-85223712

| SAMPLE INFORMATION |               |                     |                   |
|--------------------|---------------|---------------------|-------------------|
| Sample Name:       | Y-5-e         | Acquired By:        | System            |
| Sample Type:       | Broad Unknown | Date Acquired:      | 2010-7-6 13:45:53 |
| Vial:              | 1             | Acq. Method Set:    | GPC               |
| Injection #:       | 6             | Date Processed:     | 2010-7-6 17:59:55 |
| Injection Volume:  | 10.00 ul      | Processing Method:  | PEG               |
| Run Time:          | 10.0 Minutes  | Channel Name:       | Satin Ch 1        |
| Sample Set Name:   |               | Proc. Chnl. Descr.: | GPC               |

Auto-Scaled Chromatogram

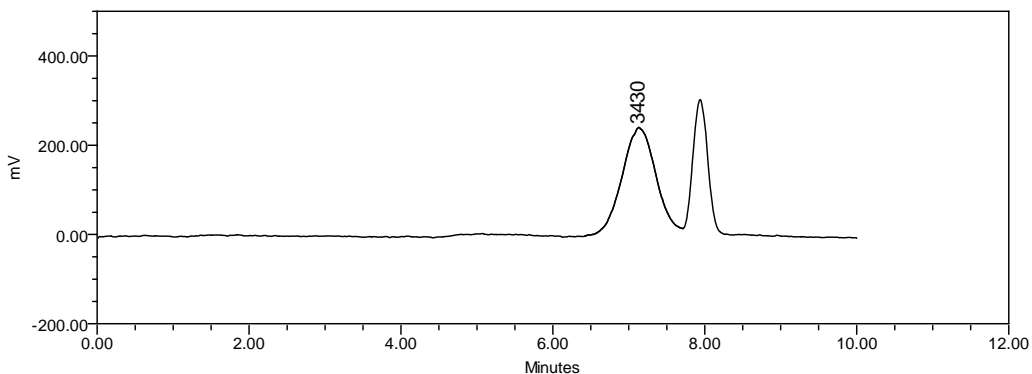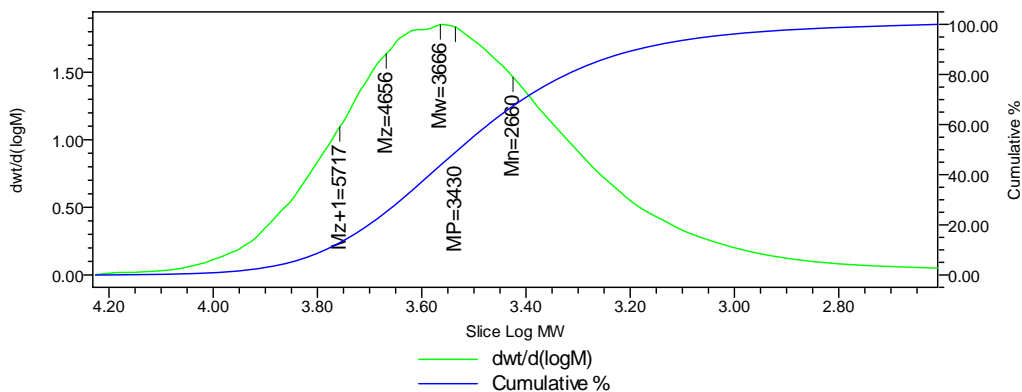

GPC Results

|   | MP (Daltons) | Mw   | Mn   | Polydispersity |
|---|--------------|------|------|----------------|
| 1 | 3430         | 3666 | 2660 | 1.38           |
